# Supplementary material for: Interlayer engineering via alkaline hypophosphates for efficient and air-stable perovskite solar cells
Source: Royal Society of Chemistry journal article supplement (doi:10.1039/d3qm00103b), 2023-01-01
Supplement: d3qm00103b1.pdf [file d3qm00103b1.pdf]

## Supporting Information

### Interlayer engineering via alkali hypophosphate for efficient and air-stable perovskite solar cells

Jin Peng,<sup>a</sup> Qiaofeng Wu,<sup>a</sup> Hongming Hou,<sup>a</sup> Taotao Hu,<sup>a</sup> Yue Huang,<sup>a</sup> Xudong Cai,<sup>a</sup> Wenjie Luo,<sup>a</sup> Xin Chen,<sup>b</sup> and Hua Yu<sup>a\*</sup>

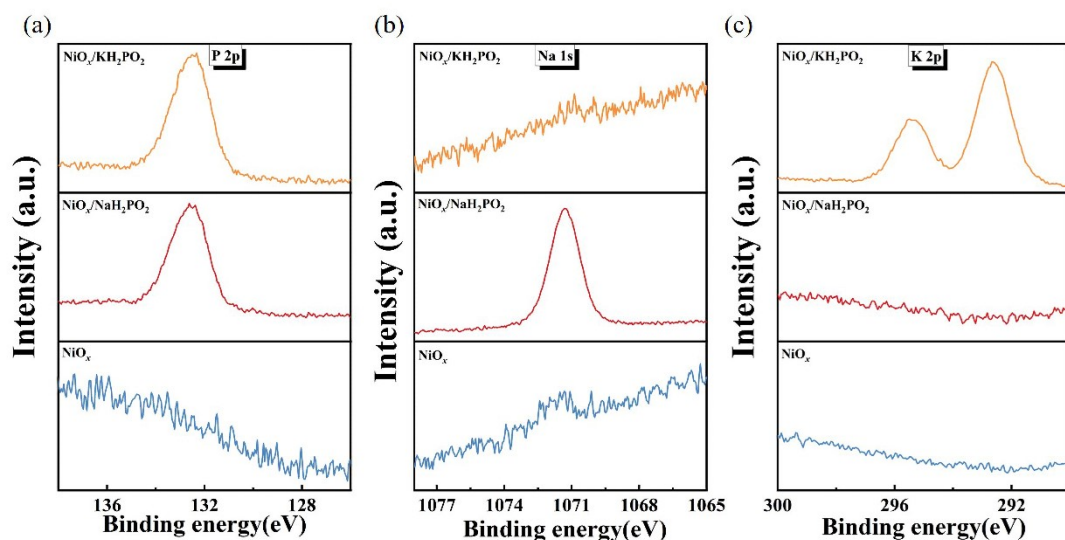

**Figure.S1:** High resolution XPS spectra of (a) P, (b) Na and (c) K elements in  $\text{NiO}_x$  with and without  $\text{MH}_2\text{PO}_2$  modification

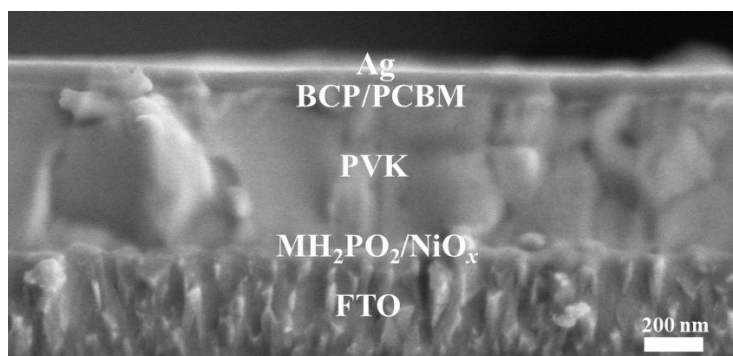

**Figure.S2:** The cross-sectional SEM images of the perovskite films

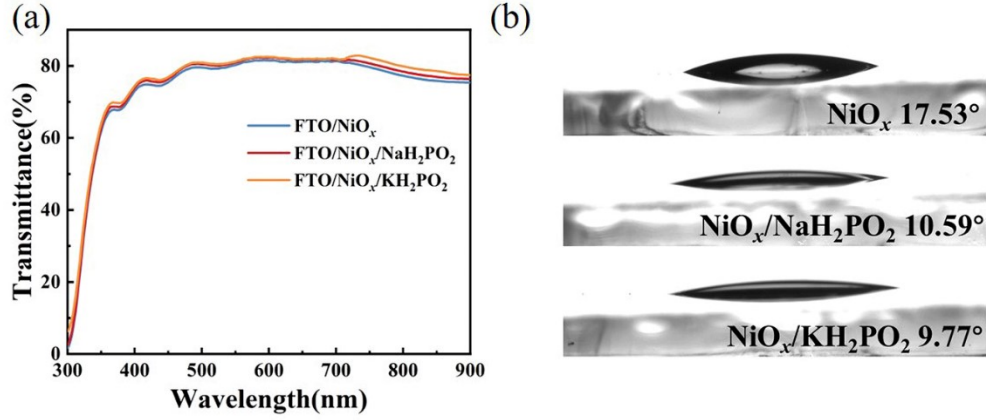

**Figure.S3:** (a) The UV-vis transmittance spectra of the NiO<sub>x</sub> films with and without MH<sub>2</sub>PO<sub>2</sub> (b) pictures of contact angle measurements of NiO<sub>x</sub> films with and without MH<sub>2</sub>PO<sub>2</sub> modification with water as the liquid.

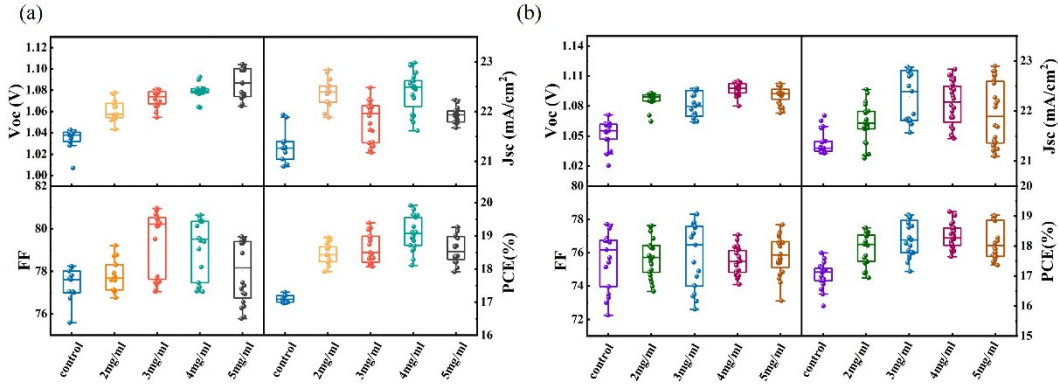

**Figure.S4:** Photovoltaic parameter statistics for the (a) NaH<sub>2</sub>PO<sub>2</sub>-modified and (b) KH<sub>2</sub>PO<sub>2</sub>-modified PSCs extracted by the J–V characteristics.

**Table S1:** The fitted lifetime values from the curves of the TRPL measurements.

| Samples                                                     | B <sub>1</sub> (%) | τ <sub>1</sub> (ns) | B <sub>2</sub> (%) | τ <sub>2</sub> (ns) | τ(ns)  |
|-------------------------------------------------------------|--------------------|---------------------|--------------------|---------------------|--------|
| FTO/NiO <sub>x</sub> /PVK                                   | 1.19               | 23.21               | 98.81              | 661.08              | 660.81 |
| FTO/NiO <sub>x</sub> /NaH <sub>2</sub> PO <sub>2</sub> /PVK | 2.38               | 55.05               | 97.62              | 864.32              | 863.07 |
| FTO/NiO <sub>x</sub> /KH <sub>2</sub> PO <sub>2</sub> /PVK  | 1.46               | 45.15               | 98.54              | 985.43              | 984.79 |

**Table S2:** The EIS fitting parameters of control and MH<sub>2</sub>PO<sub>2</sub>-passivated devices derived from Figure. 6d.

| Device                                     | R <sub>s</sub> (Ω) | R <sub>ct</sub> (Ω) |
|--------------------------------------------|--------------------|---------------------|
| Control                                    | 87.98              | 3476                |
| PSCs with NaH <sub>2</sub> PO <sub>2</sub> | 34.72              | 9033                |
| PSCs with KH <sub>2</sub> PO <sub>2</sub>  | 57.8               | 8187                |
